# Supplementary material
Source: MDPI journal article supplement (https://www.mdpi.com/2304-6740/11/6/237)
Supplement: s1 [file s1]

# Support Materials

## Effect of AST Atmosphere on Pt/C Electrocatalyst Degradation

Kirill Paperzh <sup>1</sup>, Elizaveta Moguchikh <sup>1</sup>, Ilya Pankov <sup>2</sup>, Sergey Belenov <sup>1</sup>, Anastasia Alekseenko <sup>1\*</sup>

<sup>1</sup> Southern Federal University, Faculty of Chemistry, 7 Zorge St., Rostov-on-Don, 344090, Russia; paperzh@sfedu.ru (K.P.), [moguchih@sfedu.ru](mailto:moguchih@sfedu.ru) (E.M.), [sbelenov@sfedu.ru](mailto:sbelenov@sfedu.ru) (S.B.), [aalekseenko@sfedu.ru](mailto:aalekseenko@sfedu.ru) (A.A.)

<sup>2</sup> Southern Federal University, Research Institute of Physical Organic Chemistry, 194/2 Stachki St., Rostov-on-Don, 344090, Russia; [ipankov@sfedu.ru](mailto:ipankov@sfedu.ru) (I.P.)

\* Correspondence: [aalekseenko@sfedu.ru](mailto:aalekseenko@sfedu.ru) (A.A.)

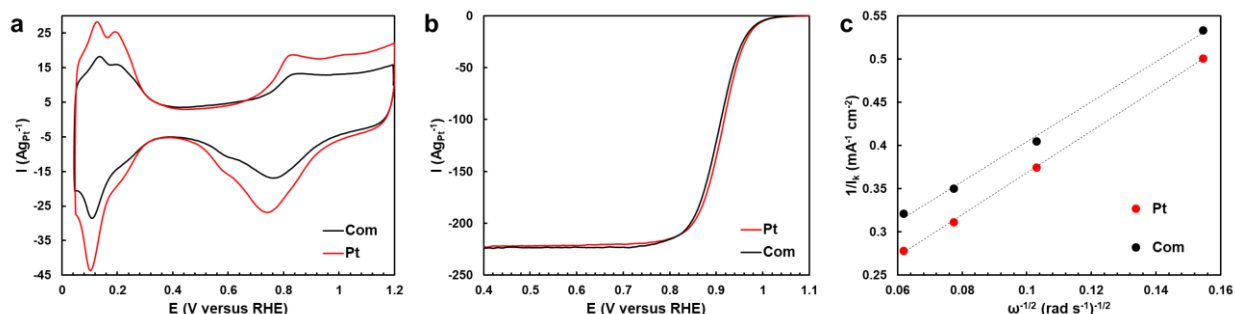

**Figure S1.** The cyclic voltammograms (a) of the Pt (red color) and Com (black color) samples. The potential sweep rate is 20 mV s<sup>-1</sup>. The second cycle. The electrolyte is the 0.1 M HClO<sub>4</sub> solution saturated with Ar at atmospheric pressure. The potentiodynamic polarization curves of the ORR (b) for the Pt (red color) and Com (black color) samples. The RDE rotation speed is 1,600 rpm. 0.1 M HClO<sub>4</sub>. O<sub>2</sub> atmosphere. The dependence of  $1/I_k$  on the RDE rotation speed in the Koutecky–Levich coordinates (c) where  $I_k$  is the current on the disk electrode with the area of 0.19625 cm<sup>2</sup>.
